# Supplementary material for: Capsaicin regulates dyslipidemia by altering the composition of bile acids in germ-free mice
Source: Royal Society of Chemistry journal article supplement (doi:10.1039/d2fo02209e), 2022-01-01
Supplement: d2fo02209e1.pdf [file d2fo02209e1.pdf]

**Figure Captions**

**FigureS1 HPLC chromatogram of bile acids (BAs) in standard solution.**

Figure S1

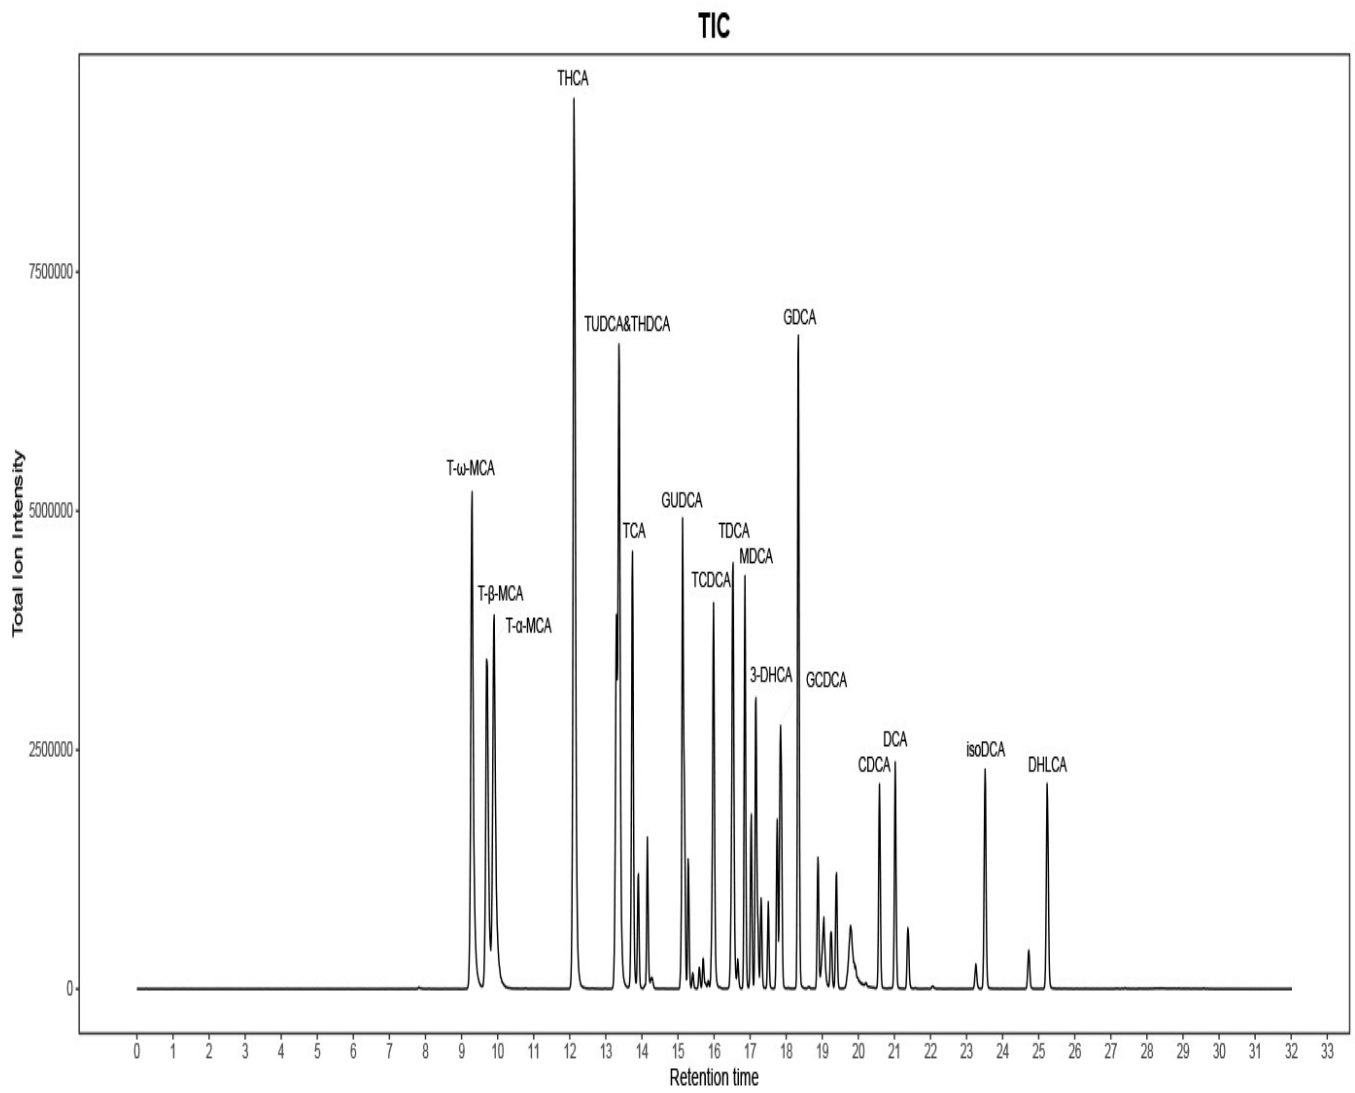

**Table S1 The ingredient compositions of the experimental diets (g/kg Diet)**

| Ingredients                            | HF    | HC    |
|----------------------------------------|-------|-------|
| Corn starch                            | 449.5 | 449.5 |
| Lard                                   | 100   | 100   |
| Soybean oil                            | 40    | 40    |
| a AIN-76 mineral mixture<br>(%mixture) | 35    | 35    |
| Casein                                 | 200   | 200   |
| b AIN-76 vitamin mixture<br>(%mixture) | 10    | 10    |
| Sucrose                                | 100   | 100   |
| L-cystine                              | 3     | 3     |
| Cellulose                              | 50    | 50    |
| Choline Chloride                       | 2.5   | 2.5   |
| Cholesterol                            | 10    | 10    |
| Capsaicin                              |       | 0.1   |

**Table S2 Calibration curves of different Bile acids (BAs) in standard solution**

| Bile acid        | Full name                                          | Linear equation                  | Correlation coefficient(R) |
|------------------|----------------------------------------------------|----------------------------------|----------------------------|
| GCA              | glycocholic acid                                   | $y = 19456.55123 x - 545.84014$  | 0.9939                     |
| GCDCA            | Glycochenodeoxycholic acid                         | $y = 19124.63048 x - 99.95925$   | 0.9949                     |
| TCA              | Taurocholic acid                                   | $y = 26515.04574 x + 3108.91887$ | 0.995                      |
| TCDC             | Taurochenodeoxycholic acid                         | $y = 3.81279e4 x - 201.34003$    | 0.9971                     |
| GUDCA            | Glycoursodeoxycholic acid                          | $y = 4.01168e4 x + 1037.08454$   | 0.9901                     |
| ACA              | Allocholic acid                                    | $y = 10096.60848 x + 105.66286$  | 0.9901                     |
| UDCA             | Ursodeoxycholic acid                               | $y = 9841.82540 x - 0.53180$     | 0.9959                     |
| DCA              | Deoxycholic acid                                   | $y = 8236.18741 x + 498.21137$   | 0.9959                     |
| TUDCA&THDCA      | tauroursodeoxycholic and taurohyodeoxycholic acids | $y = 9.65022e4 x - 1637.53227$   | 0.9919                     |
| HDCA             | Hyodeoxycholic acid                                | $y = 10468.03602 x - 32.25731$   | 0.9903                     |
| apoCA            | apocholic acid                                     | $y = 6291.34214 x - 119.00821$   | 0.9938                     |
| GDCA             | Glycodeoxycholic acid                              | $y = 6.67654e4 x - 99.49729$     | 0.9916                     |
| GLCA             | Glycolithocholic acid                              | $y = 22509.72450 x - 197.06082$  | 0.9908                     |
| $\alpha$ -MCA    | $\alpha$ -Muricholic acid                          | $y = 1556.55118 x - 58.08017$    | 0.9976                     |
| $\beta$ -MCA     | $\beta$ -Muricholic acid                           | $y = 794.23741 x + 208.75473$    | 0.9909                     |
| 7-KLCA           | 7-ketolithocholic acid                             | $y = 16301.03036 x - 382.03548$  | 0.9951                     |
| T- $\alpha$ -MCA | Tauro- $\alpha$ -muricholic acid                   | $y = 3.47228e4 x + 1052.60181$   | 0.9953                     |
| T- $\beta$ -MCA  | Tauro- $\beta$ -muricholic acid                    | $y = 4.68896e4 x + 7335.94996$   | 0.9955                     |
| $\omega$ -MCA    | $\omega$ -muricholic acid                          | $y = 3615.51297 x - 568.52041$   | 0.9935                     |
| MDCA             | murideoxycholic acid                               | $y = 25261.25326 x - 1495.57120$ | 0.9943                     |

|                 |                                        |                                 |        |
|-----------------|----------------------------------------|---------------------------------|--------|
| THCA            | Taurohyocholic acid Sodium             | $y = 8.63854e4 x + 702.34443$   | 0.9928 |
| TLCA            | Taurolithocholic acid                  | $y = 4.11768e4 x - 1626.26628$  | 0.9925 |
| TDCA            | Taurodeoxycholic acid                  | $y = 4.35018e4 x - 216.02195$   | 0.9927 |
| LCA             | Lithocholic acid                       | $y = 8004.65083 x - 188.92508$  | 0.9961 |
| CA              | Cholic acid                            | $y = 7837.66236 x - 5.72635$    | 0.9947 |
| CDCA            | Chenodeoxycholic acid                  | $y = 13302.41444 x + 330.85210$ | 0.9918 |
| HCA             | Hyochoolic acid                        | $y = 3870.87115 x + 326.56671$  | 0.9953 |
| NorCA           | Norchoolic acid                        | $y = 6670.53579 x + 184.80397$  | 0.9971 |
| GHCA            | glycohyocholic acid                    | $y = 20392.65444 x + 428.16635$ | 0.9951 |
| NorDCA          | 23-Nordeoxycholic acid                 | $y = 5466.67298 x - 242.10151$  | 0.9917 |
| isoLCA          | Isolithocholic acid                    | $y = 5085.41896 x - 126.01744$  | 0.9916 |
| 12-KLCA         | 12-ketolithocholic acid                | $y = 9085.64679 x + 26.53912$   | 0.9961 |
| LCA-3S          | Lithocholic acid 3-sulfate Sodium Salt | $y = 3.90375e4 x - 2350.27701$  | 0.9956 |
| 3 $\beta$ -UDCA | 3 $\beta$ -Ursodeoxycholic acid        | $y = 11149.47740 x + 261.27361$ | 0.9913 |
| 7,12-DKLCA      | 7,12-diketolithocholic acid            | $y = 863.64063 x - 374.85314$   | 0.9959 |
| DHCA            | Dehydrocholic acid                     | $y = 6249.11507 x - 131.69980$  | 0.9969 |
| UCA             | Ursocholic acid                        | $y = 11610.30767 x + 310.40718$ | 0.9901 |
| $\beta$ CA      | 3 $\beta$ -Cholic acid                 | $y = 16165.99097 x - 583.24252$ | 0.9933 |

---
